# Supplementary material for: Identification and subcellular localization analysis of membrane protein Ycf 1 in the microsporidian Nosema bombycis
Source: PeerJ. 2022 Jul 8;10:e13530. doi: 10.7717/peerj.13530 (PMC9272817; doi:10.7717/peerj.13530)
Supplement: Supplemental Information 1 [file peerj-10-13530-s001.xlsx]

## Sheet: Sheet1
The concentration of the standard plasmid is 173.38 ng/μL， perform a ten-fold dilution to measure the ct value
Exported RQ Study Sample Summary and Well Information
Document Name: Plate1
Plate Type: ddCt Study
User: INSTR-ADMIN
Document Information
Operator: INSTR-ADMIN
Last Modified:
Instrument Type: Applied Biosystems 7300 Real-Time PCR System
Comments:
SDS v1.4
Thermal Cycler Profile
Stage	Repetitions	Temperature	Time	Ramp Rate	Auto Increment
1	1	95.0 ℃	02:00:00	100
2	40	95.0 ℃	00:10:00	100
		60.0 ℃	00:31:00	100
3 (Dissociation)	1	95.0 ℃	00:15:00	Auto
		60.0 ℃	00:20:00	Auto
		95.0 ℃	00:15:00	Auto
		60.0 ℃	00:15:00	Auto
2700 Mode
Data Collection : Stage 2 Step 2
PCR Volume: 20 礚
Calibrator	10
Endogenous Control
RQ Min/Max Calculation Type	Advanced
Confidence	0.95
Plate	Well ID	Well	Sample	Detector	Task	Ct	Ct Std Err	Avg Ct	Avg dCt	dCt Std Err	ddCt	RQ	RQ Min	RQ Max	Omit	Filtered	Threshold	Auto Ct	Baseline	Start	End
20220323 zhili (2)	37	D1	1/10	NbTubulin	Target	Undet.		11.242									0.2	Manual	Manual	3	15
20220323 zhili (2)	38	D2	1/10	NbTubulin	Target	Undet.		11.242									0.2	Manual	Manual	3	15
20220323 zhili (2)	39	D3	1/10	NbTubulin	Target	Undet.		11.242									0.2	Manual	Manual	3	15
20220323 zhili (2)	40	D4	1/10	NbTubulin	Target	11.242		11.242									0.2	Manual	Manual	3	15
20220323 zhili (2)	41	D5	1/10^2	NbTubulin	Target	13.124	0.024	13.097									0.2	Manual	Manual	3	15
20220323 zhili (2)	42	D6	1/10^2	NbTubulin	Target	13.086	0.024	13.097									0.2	Manual	Manual	3	15
20220323 zhili (2)	43	D7	1/10^2	NbTubulin	Target	13.144	0.024	13.097									0.2	Manual	Manual	3	15
20220323 zhili (2)	44	D8	1/10^2	NbTubulin	Target	13.034	0.024	13.097									0.2	Manual	Manual	3	15
20220323 zhili (2)	49	E1	1/10^3	NbTubulin	Target	14.372	0.065	14.209									0.2	Manual	Manual	3	15
20220323 zhili (2)	50	E2	1/10^3	NbTubulin	Target	14.213	0.065	14.209									0.2	Manual	Manual	3	15
20220323 zhili (2)	51	E3	1/10^3	NbTubulin	Target	14.054	0.065	14.209									0.2	Manual	Manual	3	15
20220323 zhili (2)	52	E4	1/10^3	NbTubulin	Target	14.197	0.065	14.209									0.2	Manual	Manual	3	15
20220323 zhili (2)	53	E5	1/10^4	NbTubulin	Target	15.723	0.389	16.195									0.2	Manual	Manual	3	15
20220323 zhili (2)	54	E6	1/10^4	NbTubulin	Target	17.296	0.389	16.195									0.2	Manual	Manual	3	15
20220323 zhili (2)	55	E7	1/10^4	NbTubulin	Target	16.183	0.389	16.195									0.2	Manual	Manual	3	15
20220323 zhili (2)	56	E8	1/10^4	NbTubulin	Target	15.577	0.389	16.195									0.2	Manual	Manual	3	15
20220323 zhili (2)	61	F1	1/10^5	NbTubulin	Target	18.414	0.082	18.183									0.2	Manual	Manual	3	15
20220323 zhili (2)	62	F2	1/10^5	NbTubulin	Target	18.045	0.082	18.183									0.2	Manual	Manual	3	15
20220323 zhili (2)	63	F3	1/10^5	NbTubulin	Target	18.176	0.082	18.183									0.2	Manual	Manual	3	15
20220323 zhili (2)	64	F4	1/10^5	NbTubulin	Target	18.097	0.082	18.183									0.2	Manual	Manual	3	15
20220323 zhili (2)	65	F5	1/10^6	NbTubulin	Target	19.721	0.119	19.812									0.2	Manual	Manual	3	15
20220323 zhili (2)	66	F6	1/10^6	NbTubulin	Target	20.161	0.119	19.812									0.2	Manual	Manual	3	15
20220323 zhili (2)	67	F7	1/10^6	NbTubulin	Target	19.63	0.119	19.812									0.2	Manual	Manual	3	15
20220323 zhili (2)	68	F8	1/10^6	NbTubulin	Target	19.737	0.119	19.812									0.2	Manual	Manual	3	15
20220323 zhili (2)	73	G1	1/10^7	NbTubulin	Target	20.324	0.427	20.545									0.2	Manual	Manual	3	15
20220323 zhili (2)	74	G2	1/10^7	NbTubulin	Target	21.806	0.427	20.545									0.2	Manual	Manual	3	15
20220323 zhili (2)	75	G3	1/10^7	NbTubulin	Target	20.08	0.427	20.545									0.2	Manual	Manual	3	15
20220323 zhili (2)	76	G4	1/10^7	NbTubulin	Target	19.97	0.427	20.545									0.2	Manual	Manual	3	15
20220323 zhili (2)	77	G5	1/10^8	NbTubulin	Target	24.172	0.324	23.675									0.2	Manual	Manual	3	15
20220323 zhili (2)	78	G6	1/10^8	NbTubulin	Target	23.171	0.324	23.675									0.2	Manual	Manual	3	15
20220323 zhili (2)	79	G7	1/10^8	NbTubulin	Target	23.061	0.324	23.675									0.2	Manual	Manual	3	15
20220323 zhili (2)	80	G8	1/10^8	NbTubulin	Target	24.295	0.324	23.675									0.2	Manual	Manual	3	15
