# Supplementary material for: Identification and subcellular localization analysis of membrane protein Ycf 1 in the microsporidian Nosema bombycis
Source: PeerJ. 2022 Jul 8;10:e13530. doi: 10.7717/peerj.13530 (PMC9272817; doi:10.7717/peerj.13530)
Supplement: Supplemental Information 2 [file peerj-10-13530-s002.xlsx]

## Sheet: Sheet1
Exported RQ Study Sample Summary and Well Information
Document Name: Plate1
Plate Type: ddCt Study
User: INSTR-ADMIN
Document Information
Operator: INSTR-ADMIN
Last Modified:
Instrument Type: Applied Biosystems 7300 Real-Time PCR System
Comments:
SDS v1.4
Thermal Cycler Profile
Stage	Repetitions	Temperature	Time	Ramp Rate	Auto Increment
1	1	95.0 ℃	01:00:00	100
2	45	95.0 ℃	00:15:00	100
		60.0 ℃	00:31:00	100
3 (Dissociation)	1	95.0 ℃	00:15:00	Auto
		60.0 ℃	00:20:00	Auto
		95.0 ℃	00:15:00	Auto
		60.0 ℃	00:15:00	Auto
2700 Mode
Data Collection : Stage 2 Step 2
PCR Volume: 20 μL (volume unit)
Calibrator	Ycf1-1
Endogenous Control	NbTubulin
RQ Min/Max Calculation Type	Advanced
Confidence	0.95
Dateset of 24h
Plate	Well ID	Well	Sample	Detector	Task	Ct	Ct Std Err	Avg Ct	Avg dCt	dCt Std Err	ddCt	RQ	RQ Min	RQ Max	Omit	Filtered	Threshold	Auto Ct	Baseline	Start	End
20211113YCF-CY	13	B1	Ycf1-1	YCF1	Target	28.22	0.078	28.366	-3.11	0.391	0	1	0.472	2.121			0.2	Manual	Manual	3	15
20211113YCF-CY	14	B2	Ycf1-1	YCF1	Target	28.391	0.078	28.366	-3.11	0.391	0	1	0.472	2.121			0.2	Manual	Manual	3	15
20211113YCF-CY	15	B3	Ycf1-1	YCF1	Target	26.773	0.078	28.366	-3.11	0.391	0	1	0.472	2.121		Outlier	0.2	Manual	Manual	3	15
20211113YCF-CY	16	B4	Ycf1-1	YCF1	Target	28.489	0.078	28.366	-3.11	0.391	0	1	0.472	2.121			0.2	Manual	Manual	3	15
20211113YCF-CY	17	B5	Ycf1-1	NbTubulin	ENDO										Omit
20211113YCF-CY	18	B6	Ycf1-1	NbTubulin	ENDO	31.25	0.383	31.477									0.2	Manual	Manual	3	15
20211113YCF-CY	19	B7	Ycf1-1	NbTubulin	ENDO	32.223	0.383	31.477									0.2	Manual	Manual	3	15
20211113YCF-CY	20	B8	Ycf1-1	NbTubulin	ENDO	30.957	0.383	31.477									0.2	Manual	Manual	3	15
20211113YCF-CY	37	D1	yCF1-NC	YCF1	Target	26.323	0.327	26.356	-6.79	1.055	-3.68	12.816	2.14	76.734			0.2	Manual	Manual	3
20211113YCF-CY	38	D2	yCF1-NC	YCF1	Target	25.73	0.327	26.356	-6.79	1.055	-3.68	12.816	2.14	76.734			0.2	Manual	Manual	3
20211113YCF-CY	39	D3	yCF1-NC	YCF1	Target	26.105	0.327	26.356	-6.79	1.055	-3.68	12.816	2.14	76.734			0.2	Manual	Manual	3
20211113YCF-CY	40	D4	yCF1-NC	YCF1	Target	27.265	0.327	26.356	-6.79	1.055	-3.68	12.816	2.14	76.734			0.2	Manual	Manual	3
20211113YCF-CY	41	D5	yCF1-NC	NbTubulin	ENDO	32.129	0.057	32.144									0.2	Manual	Manual	3
20211113YCF-CY	42	D6	yCF1-NC	NbTubulin	ENDO	32.25	0.057	32.144									0.2	Manual	Manual	3
20211113YCF-CY	43	D7	yCF1-NC	NbTubulin	ENDO	36.153	0.057	32.144								Outlier	0.2	Manual	Manual	3
20211113YCF-CY	44	D8	yCF1-NC	NbTubulin	ENDO	32.052	0.057	32.144									0.2	Manual	Manual	3
20211113YCF-CY	49	E1	Ycf1-DDH2O	YCF1	Target	27.258	0.189	26.857	-5.66	0.409	-2.55	5.856	2.927	11.716			0.2	Manual	Manual	3
20211113YCF-CY	50	E2	Ycf1-DDH2O	YCF1	Target	26.792	0.189	26.857	-5.66	0.409	-2.55	5.856	2.927	11.716			0.2	Manual	Manual	3
20211113YCF-CY	51	E3	Ycf1-DDH2O	YCF1	Target	26.366	0.189	26.857	-5.66	0.409	-2.55	5.856	2.927	11.716			0.2	Manual	Manual	3
20211113YCF-CY	52	E4	Ycf1-DDH2O	YCF1	Target	27.011	0.189	26.857	-5.66	0.409	-2.55	5.856	2.927	11.716			0.2	Manual	Manual	3
20211113YCF-CY	53	E5	Ycf1-DDH2O	NbTubulin	ENDO	31.743	0.362	32.517									0.2	Manual	Manual	3
20211113YCF-CY	54	E6	Ycf1-DDH2O	NbTubulin	ENDO	33.415	0.362	32.517									0.2	Manual	Manual	3
20211113YCF-CY	55	E7	Ycf1-DDH2O	NbTubulin	ENDO	32.169	0.362	32.517									0.2	Manual	Manual	3
20211113YCF-CY	56	E8	Ycf1-DDH2O	NbTubulin	ENDO	32.74	0.362	32.517									0.2	Manual	Manual	3
second repetition
20211201Ycf-Cy-24h(4)	13	B1	Ycf1-1	YCF1	Target	27.762	0.327	27.441	-5.264	0.551	1.966	0.256	0.096	0.683			0.2	Manual	Manual	3	15
20211201Ycf-Cy-24h(4)	14	B2	Ycf1-1	YCF1	Target	28.143	0.327	27.441	-5.264	0.551	1.966	0.256	0.096	0.683			0.2	Manual	Manual	3	15
20211201Ycf-Cy-24h(4)	15	B3	Ycf1-1	YCF1	Target	26.644	0.327	27.441	-5.264	0.551	1.966	0.256	0.096	0.683			0.2	Manual	Manual	3	15
20211201Ycf-Cy-24h(4)	16	B4	Ycf1-1	YCF1	Target	27.213	0.327	27.441	-5.264	0.551	1.966	0.256	0.096	0.683			0.2	Manual	Manual	3	15
20211201Ycf-Cy-24h(4)	17	B5	Ycf1-1	NbTubulin	ENDO	33.027	0.444	32.705									0.2	Manual	Manual	3	15
20211201Ycf-Cy-24h(4)	18	B6	Ycf1-1	NbTubulin	ENDO	31.828	0.444	32.705									0.2	Manual	Manual	3	15
20211201Ycf-Cy-24h(4)	19	B7	Ycf1-1	NbTubulin	ENDO										Omit
20211201Ycf-Cy-24h(4)	20	B8	Ycf1-1	NbTubulin	ENDO	33.26	0.444	32.705									0.2	Manual	Manual	3	15
20211201Ycf-Cy-24h(4)	25	C1	NC	YCF1	Target	25.154	0.07	25.108	-7.908	1.242	-0.679	1.601	0.175	14.636			0.2	Manual	Manual	3	15
20211201Ycf-Cy-24h(4)	26	C2	NC	YCF1	Target	24.971	0.07	25.108	-7.908	1.242	-0.679	1.601	0.175	14.636			0.2	Manual	Manual	3	15
20211201Ycf-Cy-24h(4)	27	C3	NC	YCF1	Target	28.066	0.07	25.108	-7.908	1.242	-0.679	1.601	0.175	14.636		Outlier	0.2	Manual	Manual	3	15
20211201Ycf-Cy-24h(4)	28	C4	NC	YCF1	Target	25.201	0.07	25.108	-7.908	1.242	-0.679	1.601	0.175	14.636			0.2	Manual	Manual	3	15
20211201Ycf-Cy-24h(4)	29	C5	NC	NbTubulin	ENDO	31.435	0.187	31.784									0.2	Manual	Manual	3	15
20211201Ycf-Cy-24h(4)	30	C6	NC	NbTubulin	ENDO	31.843	0.187	31.784									0.2	Manual	Manual	3	15
20211201Ycf-Cy-24h(4)	31	C7	NC	NbTubulin	ENDO	36.716	0.187	31.784								Outlier	0.2	Manual	Manual	3	15
20211201Ycf-Cy-24h(4)	32	C8	NC	NbTubulin	ENDO	32.074	0.187	31.784									0.2	Manual	Manual	3	15
20211201Ycf-Cy-24h(4)	37	D1	ddH2O	YCF1	Target	25.935	0.197	25.717	-7.23	0.562	0	1	0.368	2.721			0.2	Manual	Manual	3	15
20211201Ycf-Cy-24h(4)	38	D2	ddH2O	YCF1	Target	25.274	0.197	25.717	-7.23	0.562	0	1	0.368	2.721			0.2	Manual	Manual	3	15
20211201Ycf-Cy-24h(4)	39	D3	ddH2O	YCF1	Target	25.517	0.197	25.717	-7.23	0.562	0	1	0.368	2.721			0.2	Manual	Manual	3	15
20211201Ycf-Cy-24h(4)	40	D4	ddH2O	YCF1	Target	26.143	0.197	25.717	-7.23	0.562	0	1	0.368	2.721			0.2	Manual	Manual	3	15
20211201Ycf-Cy-24h(4)	41	D5	ddH2O	NbTubulin	ENDO	32.394	0.526	32.947									0.2	Manual	Manual	3	15
20211201Ycf-Cy-24h(4)	42	D6	ddH2O	NbTubulin	ENDO	32.448	0.526	32.947									0.2	Manual	Manual	3	15
20211201Ycf-Cy-24h(4)	43	D7	ddH2O	NbTubulin	ENDO	33.999	0.526	32.947									0.2	Manual	Manual	3	15
20211201Ycf-Cy-24h(4)	44	D8	ddH2O	NbTubulin	ENDO	Undet.		32.947									0.2	Manual	Manual	3	15
the third repetition
20211203Ycf-Cy-24h	72h(5)	13	B1	1-24h	YCF1	Target	28.076	0.346	27.636	-4.143	0.559	0	1	0.369	2.71			0.2	Manual	Manual	3
20211203Ycf-Cy-24h	72h(5)	14	B2	1-24h	YCF1	Target	28.358	0.346	27.636	-4.143	0.559	0	1	0.369	2.71			0.2	Manual	Manual	3
20211203Ycf-Cy-24h	72h(5)	15	B3	1-24h	YCF1	Target	26.902	0.346	27.636	-4.143	0.559	0	1	0.369	2.71			0.2	Manual	Manual	3
20211203Ycf-Cy-24h	72h(5)	16	B4	1-24h	YCF1	Target	27.207	0.346	27.636	-4.143	0.559	0	1	0.369	2.71			0.2	Manual	Manual	3
20211203Ycf-Cy-24h	72h(5)	17	B5	1-24h	NbTubulin	ENDO	32.551	0.44	31.779									0.2	Manual	Manual	3
20211203Ycf-Cy-24h	72h(5)	18	B6	1-24h	NbTubulin	ENDO	31.029	0.44	31.779									0.2	Manual	Manual	3
20211203Ycf-Cy-24h	72h(5)	19	B7	1-24h	NbTubulin	ENDO	31.757	0.44	31.779									0.2	Manual	Manual	3
20211203Ycf-Cy-24h	72h(5)	20	B8	1-24h	NbTubulin	ENDO										Omit
20211203Ycf-Cy-24h	72h(5)	25	C1	NC-24h	YCF1	Target	25.218	0.078	25.36	-6.067	0.403	-1.924	3.795	1.85	7.787			0.2	Manual	Manual	3
20211203Ycf-Cy-24h	72h(5)	26	C2	NC-24h	YCF1	Target	25.377	0.078	25.36	-6.067	0.403	-1.924	3.795	1.85	7.787			0.2	Manual	Manual	3
20211203Ycf-Cy-24h	72h(5)	27	C3	NC-24h	YCF1	Target	28.465	0.078	25.36	-6.067	0.403	-1.924	3.795	1.85	7.787		Outlier	0.2	Manual	Manual	3
20211203Ycf-Cy-24h	72h(5)	28	C4	NC-24h	YCF1	Target	25.486	0.078	25.36	-6.067	0.403	-1.924	3.795	1.85	7.787			0.2	Manual	Manual	3
20211203Ycf-Cy-24h	72h(5)	29	C5	NC-24h	NbTubulin	ENDO	30.446	0.396	31.428									0.2	Manual	Manual	3
20211203Ycf-Cy-24h	72h(5)	30	C6	NC-24h	NbTubulin	ENDO	31.162	0.396	31.428									0.2	Manual	Manual	3
20211203Ycf-Cy-24h	72h(5)	31	C7	NC-24h	NbTubulin	ENDO	31.863	0.396	31.428									0.2	Manual	Manual	3
20211203Ycf-Cy-24h	72h(5)	32	C8	NC-24h	NbTubulin	ENDO	32.239	0.396	31.428									0.2	Manual	Manual	3
20211203Ycf-Cy-24h	72h(5)	37	D1	ddH2O-24h	YCF1	Target	25.035	0.157	25.332	-6.056	0.425	-1.913	3.765	1.765	8.035			0.2	Manual	Manual	3
20211203Ycf-Cy-24h	72h(5)	38	D2	ddH2O-24h	YCF1	Target	25.428	0.157	25.332	-6.056	0.425	-1.913	3.765	1.765	8.035			0.2	Manual	Manual	3
20211203Ycf-Cy-24h	72h(5)	39	D3	ddH2O-24h	YCF1	Target	25.73	0.157	25.332	-6.056	0.425	-1.913	3.765	1.765	8.035			0.2	Manual	Manual	3
20211203Ycf-Cy-24h	72h(5)	40	D4	ddH2O-24h	YCF1	Target	25.136	0.157	25.332	-6.056	0.425	-1.913	3.765	1.765	8.035			0.2	Manual	Manual	3
20211203Ycf-Cy-24h	72h(5)	41	D5	ddH2O-24h	NbTubulin	ENDO	30.729	0.396	31.388									0.2	Manual	Manual	3
20211203Ycf-Cy-24h	72h(5)	42	D6	ddH2O-24h	NbTubulin	ENDO	32.096	0.396	31.388									0.2	Manual	Manual	3
20211203Ycf-Cy-24h	72h(5)	43	D7	ddH2O-24h	NbTubulin	ENDO										Omit
20211203Ycf-Cy-24h	72h(5)	44	D8	ddH2O-24h	NbTubulin	ENDO	31.339	0.396	31.388									0.2	Manual	Manual	3
Dateset of 48h
Plate	Well ID	Well	Sample	Detector	Task	Ct	Ct Std Err	Avg Ct	Avg dCt	dCt Std Err	ddCt	RQ	RQ Min	RQ Max	Omit	Filtered	Threshold	Auto Ct	Baseline	Start	End
20211121Ycf-Cy-48h(2)	13	B1	Ycf1-1	YCF1	Target	27.318	0.121	27.119	-3.176	0.466	0	1	0.454	2.203			0.2	Manual	Manual	3	15
20211121Ycf-Cy-48h(2)	14	B2	Ycf1-1	YCF1	Target	27.109	0.121	27.119	-3.176	0.466	0	1	0.454	2.203			0.2	Manual	Manual	3	15
20211121Ycf-Cy-48h(2)	15	B3	Ycf1-1	YCF1	Target	26.782	0.121	27.119	-3.176	0.466	0	1	0.454	2.203			0.2	Manual	Manual	3	15
20211121Ycf-Cy-48h(2)	16	B4	Ycf1-1	YCF1	Target	27.268	0.121	27.119	-3.176	0.466	0	1	0.454	2.203			0.2	Manual	Manual	3	15
20211121Ycf-Cy-48h(2)	17	B5	Ycf1-1	NbTubulin	ENDO	31.339	0.45	30.296									0.2	Manual	Manual	3	15
20211121Ycf-Cy-48h(2)	18	B6	Ycf1-1	NbTubulin	ENDO	29.323	0.45	30.296									0.2	Manual	Manual	3	15
20211121Ycf-Cy-48h(2)	19	B7	Ycf1-1	NbTubulin	ENDO	29.82	0.45	30.296									0.2	Manual	Manual	3	15
20211121Ycf-Cy-48h(2)	20	B8	Ycf1-1	NbTubulin	ENDO	30.702	0.45	30.296									0.2	Manual	Manual	3	15
20211121Ycf-Cy-48h(2)	37	D1	Ycf1-NC	YCF1	Target	24.869	0.117	24.834	-3.309	0.213	-0.132	1.096	0.749	1.603			0.2	Manual	Manual	3	15
20211121Ycf-Cy-48h(2)	38	D2	Ycf1-NC	YCF1	Target	24.493	0.117	24.834	-3.309	0.213	-0.132	1.096	0.749	1.603			0.2	Manual	Manual	3	15
20211121Ycf-Cy-48h(2)	39	D3	Ycf1-NC	YCF1	Target	24.99	0.117	24.834	-3.309	0.213	-0.132	1.096	0.749	1.603			0.2	Manual	Manual	3	15
20211121Ycf-Cy-48h(2)	40	D4	Ycf1-NC	YCF1	Target	24.985	0.117	24.834	-3.309	0.213	-0.132	1.096	0.749	1.603			0.2	Manual	Manual	3	15
20211121Ycf-Cy-48h(2)	41	D5	Ycf1-NC	NbTubulin	ENDO	28.487	0.178	28.143									0.2	Manual	Manual	3	15
20211121Ycf-Cy-48h(2)	42	D6	Ycf1-NC	NbTubulin	ENDO	28.054	0.178	28.143									0.2	Manual	Manual	3	15
20211121Ycf-Cy-48h(2)	43	D7	Ycf1-NC	NbTubulin	ENDO										Omit
20211121Ycf-Cy-48h(2)	44	D8	Ycf1-NC	NbTubulin	ENDO	27.888	0.178	28.143									0.2	Manual	Manual	3	15
20211121Ycf-Cy-48h(2)	49	E1	Ycf1-ddH2O	YCF1	Target	25.51	0.432	25.952	-4.029	0.614	-0.852	1.805	0.605	5.391			0.2	Manual	Manual	3	15
20211121Ycf-Cy-48h(2)	50	E2	Ycf1-ddH2O	YCF1	Target	25.061	0.432	25.952	-4.029	0.614	-0.852	1.805	0.605	5.391			0.2	Manual	Manual	3	15
20211121Ycf-Cy-48h(2)	51	E3	Ycf1-ddH2O	YCF1	Target	26.196	0.432	25.952	-4.029	0.614	-0.852	1.805	0.605	5.391			0.2	Manual	Manual	3	15
20211121Ycf-Cy-48h(2)	52	E4	Ycf1-ddH2O	YCF1	Target	27.042	0.432	25.952	-4.029	0.614	-0.852	1.805	0.605	5.391			0.2	Manual	Manual	3	15
20211121Ycf-Cy-48h(2)	53	E5	Ycf1-ddH2O	NbTubulin	ENDO	29.811	0.436	29.981									0.2	Manual	Manual	3	15
20211121Ycf-Cy-48h(2)	54	E6	Ycf1-ddH2O	NbTubulin	ENDO										Omit
20211121Ycf-Cy-48h(2)	55	E7	Ycf1-ddH2O	NbTubulin	ENDO	30.808	0.436	29.981									0.2	Manual	Manual	3	15
20211121Ycf-Cy-48h(2)	56	E8	Ycf1-ddH2O	NbTubulin	ENDO	29.325	0.436	29.981									0.2	Manual	Manual	3	15
second repetition
20211124Ycf-Cy-48h(3)	13	B1	Ycf1-1	YCF1	Target	26.127	0.331	25.854	-4.624	0.459	0	1	0.459	2.177			0.2	Manual	Manual	3	15
20211124Ycf-Cy-48h(3)	14	B2	Ycf1-1	YCF1	Target	26.352	0.331	25.854	-4.624	0.459	0	1	0.459	2.177			0.2	Manual	Manual	3	15
20211124Ycf-Cy-48h(3)	15	B3	Ycf1-1	YCF1	Target	24.877	0.331	25.854	-4.624	0.459	0	1	0.459	2.177			0.2	Manual	Manual	3	15
20211124Ycf-Cy-48h(3)	16	B4	Ycf1-1	YCF1	Target	26.058	0.331	25.854	-4.624	0.459	0	1	0.459	2.177			0.2	Manual	Manual	3	15
20211124Ycf-Cy-48h(3)	17	B5	Ycf1-1	NbTubulin	ENDO	31.411	0.317	30.478									0.2	Manual	Manual	3	15
20211124Ycf-Cy-48h(3)	18	B6	Ycf1-1	NbTubulin	ENDO	29.992	0.317	30.478									0.2	Manual	Manual	3	15
20211124Ycf-Cy-48h(3)	19	B7	Ycf1-1	NbTubulin	ENDO	30.268	0.317	30.478									0.2	Manual	Manual	3	15
20211124Ycf-Cy-48h(3)	20	B8	Ycf1-1	NbTubulin	ENDO	30.241	0.317	30.478									0.2	Manual	Manual	3	15
20211124Ycf-Cy-48h(3)	37	D1	Ycf1-NC	YCF1	Target	23.638	0.212	23.62	-4.951	0.346	-0.327	1.254	0.677	2.323			0.2	Manual	Manual	3	15
20211124Ycf-Cy-48h(3)	38	D2	Ycf1-NC	YCF1	Target	23.473	0.212	23.62	-4.951	0.346	-0.327	1.254	0.677	2.323			0.2	Manual	Manual	3	15
20211124Ycf-Cy-48h(3)	39	D3	Ycf1-NC	YCF1	Target	23.181	0.212	23.62	-4.951	0.346	-0.327	1.254	0.677	2.323			0.2	Manual	Manual	3	15
20211124Ycf-Cy-48h(3)	40	D4	Ycf1-NC	YCF1	Target	24.187	0.212	23.62	-4.951	0.346	-0.327	1.254	0.677	2.323			0.2	Manual	Manual	3	15
20211124Ycf-Cy-48h(3)	41	D5	Ycf1-NC	NbTubulin	ENDO	28.201	0.274	28.571									0.2	Manual	Manual	3	15
20211124Ycf-Cy-48h(3)	42	D6	Ycf1-NC	NbTubulin	ENDO										Omit
20211124Ycf-Cy-48h(3)	43	D7	Ycf1-NC	NbTubulin	ENDO	29.106	0.274	28.571									0.2	Manual	Manual	3	15
20211124Ycf-Cy-48h(3)	44	D8	Ycf1-NC	NbTubulin	ENDO	28.406	0.274	28.571									0.2	Manual	Manual	3	15
20211124Ycf-Cy-48h(3)	49	E1	Ycf1-ddH2O	YCF1	Target	23.433	0.393	24.175	-5.883	0.561	-1.259	2.393	0.881	6.5			0.2	Manual	Manual	3	15
20211124Ycf-Cy-48h(3)	50	E2	Ycf1-ddH2O	YCF1	Target	23.617	0.393	24.175	-5.883	0.561	-1.259	2.393	0.881	6.5			0.2	Manual	Manual	3	15
20211124Ycf-Cy-48h(3)	51	E3	Ycf1-ddH2O	YCF1	Target	24.563	0.393	24.175	-5.883	0.561	-1.259	2.393	0.881	6.5			0.2	Manual	Manual	3	15
20211124Ycf-Cy-48h(3)	52	E4	Ycf1-ddH2O	YCF1	Target	25.089	0.393	24.175	-5.883	0.561	-1.259	2.393	0.881	6.5			0.2	Manual	Manual	3	15
20211124Ycf-Cy-48h(3)	53	E5	Ycf1-ddH2O	NbTubulin	ENDO	30.064	0.401	30.059									0.2	Manual	Manual	3	15
20211124Ycf-Cy-48h(3)	54	E6	Ycf1-ddH2O	NbTubulin	ENDO										Omit
20211124Ycf-Cy-48h(3)	55	E7	Ycf1-ddH2O	NbTubulin	ENDO	30.75	0.401	30.059									0.2	Manual	Manual	3	15
20211124Ycf-Cy-48h(3)	56	E8	Ycf1-ddH2O	NbTubulin	ENDO	29.362	0.401	30.059									0.2	Manual	Manual	3	15
the third repetition
20211201Ycf-Cy-48h.72hh(4)	13	B1	1-48h	YCF1	Target	27.564	0.49	27.244	-2.908	0.506	0	1	0.378	2.646			0.2	Manual	Manual	3	15
20211201Ycf-Cy-48h.72hh(4)	14	B2	1-48h	YCF1	Target	28.246	0.49	27.244	-2.908	0.506	0	1	0.378	2.646			0.2	Manual	Manual	3	15
20211201Ycf-Cy-48h.72hh(4)	15	B3	1-48h	YCF1	Target	25.911	0.49	27.244	-2.908	0.506	0	1	0.378	2.646			0.2	Manual	Manual	3	15
20211201Ycf-Cy-48h.72hh(4)	16	B4	1-48h	YCF1	Target	27.254	0.49	27.244	-2.908	0.506	0	1	0.378	2.646			0.2	Manual	Manual	3	15
20211201Ycf-Cy-48h.72hh(4)	17	B5	1-48h	NbTubulin	ENDO										Omit
20211201Ycf-Cy-48h.72hh(4)	18	B6	1-48h	NbTubulin	ENDO										Omit
20211201Ycf-Cy-48h.72hh(4)	19	B7	1-48h	NbTubulin	ENDO	30.276	0.124	30.152									0.2	Manual	Manual	3	15
20211201Ycf-Cy-48h.72hh(4)	20	B8	1-48h	NbTubulin	ENDO	30.028	0.124	30.152									0.2	Manual	Manual	3	15
20211201Ycf-Cy-48h.72hh(4)	25	C1	NC-48h	YCF1	Target	24.22	0.198	24.531	-3.638	0.217	-0.73	1.658	1.126	2.442			0.2	Manual	Manual	3	15
20211201Ycf-Cy-48h.72hh(4)	26	C2	NC-48h	YCF1	Target	24.472	0.198	24.531	-3.638	0.217	-0.73	1.658	1.126	2.442			0.2	Manual	Manual	3	15
20211201Ycf-Cy-48h.72hh(4)	27	C3	NC-48h	YCF1	Target										Omit
20211201Ycf-Cy-48h.72hh(4)	28	C4	NC-48h	YCF1	Target	24.9	0.198	24.531	-3.638	0.217	-0.73	1.658	1.126	2.442			0.2	Manual	Manual	3	15
20211201Ycf-Cy-48h.72hh(4)	29	C5	NC-48h	NbTubulin	ENDO	28.025	0.089	28.169									0.2	Manual	Manual	3	15
20211201Ycf-Cy-48h.72hh(4)	30	C6	NC-48h	NbTubulin	ENDO	28.095	0.089	28.169									0.2	Manual	Manual	3	15
20211201Ycf-Cy-48h.72hh(4)	31	C7	NC-48h	NbTubulin	ENDO	28.127	0.089	28.169									0.2	Manual	Manual	3	15
20211201Ycf-Cy-48h.72hh(4)	32	C8	NC-48h	NbTubulin	ENDO	28.427	0.089	28.169									0.2	Manual	Manual	3	15
20211201Ycf-Cy-48h.72hh(4)	37	D1	ddH2O-48h	YCF1	Target	23.953	0.477	24.968	-4.698	0.581	-1.79	3.457	1.227	9.739			0.2	Manual	Manual	3	15
20211201Ycf-Cy-48h.72hh(4)	38	D2	ddH2O-48h	YCF1	Target	25.222	0.477	24.968	-4.698	0.581	-1.79	3.457	1.227	9.739			0.2	Manual	Manual	3	15
20211201Ycf-Cy-48h.72hh(4)	39	D3	ddH2O-48h	YCF1	Target	24.527	0.477	24.968	-4.698	0.581	-1.79	3.457	1.227	9.739			0.2	Manual	Manual	3	15
20211201Ycf-Cy-48h.72hh(4)	40	D4	ddH2O-48h	YCF1	Target	26.17	0.477	24.968	-4.698	0.581	-1.79	3.457	1.227	9.739			0.2	Manual	Manual	3	15
20211201Ycf-Cy-48h.72hh(4)	41	D5	ddH2O-48h	NbTubulin	ENDO	29.053	0.332	29.666									0.2	Manual	Manual	3	15
20211201Ycf-Cy-48h.72hh(4)	42	D6	ddH2O-48h	NbTubulin	ENDO	29.753	0.332	29.666									0.2	Manual	Manual	3	15
20211201Ycf-Cy-48h.72hh(4)	43	D7	ddH2O-48h	NbTubulin	ENDO										Omit
20211201Ycf-Cy-48h.72hh(4)	44	D8	ddH2O-48h	NbTubulin	ENDO	30.192	0.332	29.666									0.2	Manual	Manual	3	15
Dataset of 72h
Plate	Well ID	Well	Sample	Detector	Task	Ct	Ct Std Err	Avg Ct	Avg dCt	dCt Std Err	ddCt	RQ	RQ Min	RQ Max	Omit	Filtered	Threshold	Auto Ct	Baseline	Start	End
20211122Ycf-Cy-72h(2)	13	B1	Ycf1-1	YCF1	Target	27.119	0.44	27.546	-2.579	0.655	0	1	0.311	3.212			0.2	Manual	Manual	3	15
20211122Ycf-Cy-72h(2)	14	B2	Ycf1-1	YCF1	Target	28.583	0.44	27.546	-2.579	0.655	0	1	0.311	3.212			0.2	Manual	Manual	3	15
20211122Ycf-Cy-72h(2)	15	B3	Ycf1-1	YCF1	Target	26.578	0.44	27.546	-2.579	0.655	0	1	0.311	3.212			0.2	Manual	Manual	3	15
20211122Ycf-Cy-72h(2)	16	B4	Ycf1-1	YCF1	Target	27.903	0.44	27.546	-2.579	0.655	0	1	0.311	3.212			0.2	Manual	Manual	3	15
20211122Ycf-Cy-72h(2)	17	B5	Ycf1-1	NbTubulin	ENDO										Omit
20211122Ycf-Cy-72h(2)	18	B6	Ycf1-1	NbTubulin	ENDO	29.155	0.485	30.125									0.2	Manual	Manual	3	15
20211122Ycf-Cy-72h(2)	19	B7	Ycf1-1	NbTubulin	ENDO	30.635	0.485	30.125									0.2	Manual	Manual	3	15
20211122Ycf-Cy-72h(2)	20	B8	Ycf1-1	NbTubulin	ENDO	30.585	0.485	30.125									0.2	Manual	Manual	3	15
20211122Ycf-Cy-72h(2)	37	D1	Ycf1-NC	YCF1	Target	25.85	0.463	25.731	-2.072	0.54	0.508	0.703	0.269	1.839			0.2	Manual	Manual	3
20211122Ycf-Cy-72h(2)	38	D2	Ycf1-NC	YCF1	Target	25.374	0.463	25.731	-2.072	0.54	0.508	0.703	0.269	1.839			0.2	Manual	Manual	3
20211122Ycf-Cy-72h(2)	39	D3	Ycf1-NC	YCF1	Target	24.754	0.463	25.731	-2.072	0.54	0.508	0.703	0.269	1.839			0.2	Manual	Manual	3
20211122Ycf-Cy-72h(2)	40	D4	Ycf1-NC	YCF1	Target	26.948	0.463	25.731	-2.072	0.54	0.508	0.703	0.269	1.839			0.2	Manual	Manual	3
20211122Ycf-Cy-72h(2)	41	D5	Ycf1-NC	NbTubulin	ENDO	28.311	0.276	27.803									0.2	Manual	Manual	3
20211122Ycf-Cy-72h(2)	42	D6	Ycf1-NC	NbTubulin	ENDO	27.736	0.276	27.803									0.2	Manual	Manual	3
20211122Ycf-Cy-72h(2)	43	D7	Ycf1-NC	NbTubulin	ENDO										Omit
20211122Ycf-Cy-72h(2)	44	D8	Ycf1-NC	NbTubulin	ENDO	27.361	0.276	27.803									0.2	Manual	Manual	3
20211122Ycf-Cy-72h(2)	49	E1	Ycf1-ddH2O	YCF1	Target	24.607	0.014	24.632	-1.986	0.634	0.593	0.663	0.214	2.051			0.2	Manual	Manual	3
20211122Ycf-Cy-72h(2)	50	E2	Ycf1-ddH2O	YCF1	Target	24.633	0.014	24.632	-1.986	0.634	0.593	0.663	0.214	2.051			0.2	Manual	Manual	3
20211122Ycf-Cy-72h(2)	51	E3	Ycf1-ddH2O	YCF1	Target	24.657	0.014	24.632	-1.986	0.634	0.593	0.663	0.214	2.051			0.2	Manual	Manual	3
20211122Ycf-Cy-72h(2)	52	E4	Ycf1-ddH2O	YCF1	Target	25.35	0.014	24.632	-1.986	0.634	0.593	0.663	0.214	2.051		Outlier	0.2	Manual	Manual	3
20211122Ycf-Cy-72h(2)	53	E5	Ycf1-ddH2O	NbTubulin	ENDO	25.782	0.138	25.992									0.2	Manual	Manual	3
20211122Ycf-Cy-72h(2)	54	E6	Ycf1-ddH2O	NbTubulin	ENDO	28.497	0.138	25.992								Outlier	0.2	Manual	Manual	3
20211122Ycf-Cy-72h(2)	55	E7	Ycf1-ddH2O	NbTubulin	ENDO	26.251	0.138	25.992									0.2	Manual	Manual	3
20211122Ycf-Cy-72h(2)	56	E8	Ycf1-ddH2O	NbTubulin	ENDO	25.942	0.138	25.992									0.2	Manual	Manual	3
second repetition
20211116Ycf-Cy-72h	13	B1	Ycf1-1	YCF1	Target	27.042	0.388	26.931	-2.72	0.567	0	1	0.382	2.617			0.2	Manual	Manual	3	15
20211116Ycf-Cy-72h	14	B2	Ycf1-1	YCF1	Target	27.755	0.388	26.931	-2.72	0.567	0	1	0.382	2.617			0.2	Manual	Manual	3	15
20211116Ycf-Cy-72h	15	B3	Ycf1-1	YCF1	Target	25.88	0.388	26.931	-2.72	0.567	0	1	0.382	2.617			0.2	Manual	Manual	3	15
20211116Ycf-Cy-72h	16	B4	Ycf1-1	YCF1	Target	27.048	0.388	26.931	-2.72	0.567	0	1	0.382	2.617			0.2	Manual	Manual	3	15
20211116Ycf-Cy-72h	17	B5	Ycf1-1	NbTubulin	ENDO	30.347	0.413	29.651									0.2	Manual	Manual	3	15
20211116Ycf-Cy-72h	18	B6	Ycf1-1	NbTubulin	ENDO	28.504	0.413	29.651									0.2	Manual	Manual	3	15
20211116Ycf-Cy-72h	19	B7	Ycf1-1	NbTubulin	ENDO	29.604	0.413	29.651									0.2	Manual	Manual	3	15
20211116Ycf-Cy-72h	20	B8	Ycf1-1	NbTubulin	ENDO	30.149	0.413	29.651									0.2	Manual	Manual	3	15
20211116Ycf-Cy-72h	37	D1	Ycf1-NC	YCF1	Target	24.156	0.402	24.599	-3.551	0.801	-0.831	1.779	0.457	6.925			0.2	Manual	Manual	3	15
20211116Ycf-Cy-72h	38	D2	Ycf1-NC	YCF1	Target	24.875	0.402	24.599	-3.551	0.801	-0.831	1.779	0.457	6.925			0.2	Manual	Manual	3	15
20211116Ycf-Cy-72h	39	D3	Ycf1-NC	YCF1	Target	23.772	0.402	24.599	-3.551	0.801	-0.831	1.779	0.457	6.925			0.2	Manual	Manual	3	15
20211116Ycf-Cy-72h	40	D4	Ycf1-NC	YCF1	Target	25.591	0.402	24.599	-3.551	0.801	-0.831	1.779	0.457	6.925			0.2	Manual	Manual	3	15
20211116Ycf-Cy-72h	41	D5	Ycf1-NC	NbTubulin	ENDO	27.372	0.044	27.457									0.2	Manual	Manual	3	15
20211116Ycf-Cy-72h	42	D6	Ycf1-NC	NbTubulin	ENDO	27.478	0.044	27.457									0.2	Manual	Manual	3	15
20211116Ycf-Cy-72h	43	D7	Ycf1-NC	NbTubulin	ENDO	30.227	0.044	27.457								Outlier	0.2	Manual	Manual	3	15
20211116Ycf-Cy-72h	44	D8	Ycf1-NC	NbTubulin	ENDO	27.522	0.044	27.457									0.2	Manual	Manual	3	15
20211116Ycf-Cy-72h	49	E1	Ycf1-ddH2o	YCF1	Target	24.081	0.187	24.178	-1.966	0.498	0.754	0.593	0.255	1.38			0.2	Manual	Manual	3	15
20211116Ycf-Cy-72h	50	E2	Ycf1-ddH2o	YCF1	Target	23.708	0.187	24.178	-1.966	0.498	0.754	0.593	0.255	1.38			0.2	Manual	Manual	3	15
20211116Ycf-Cy-72h	51	E3	Ycf1-ddH2o	YCF1	Target	24.344	0.187	24.178	-1.966	0.498	0.754	0.593	0.255	1.38			0.2	Manual	Manual	3	15
20211116Ycf-Cy-72h	52	E4	Ycf1-ddH2o	YCF1	Target	24.581	0.187	24.178	-1.966	0.498	0.754	0.593	0.255	1.38			0.2	Manual	Manual	3	15
20211116Ycf-Cy-72h	53	E5	Ycf1-ddH2o	NbTubulin	ENDO	25.975	0.462	26.144									0.2	Manual	Manual	3	15
20211116Ycf-Cy-72h	54	E6	Ycf1-ddH2o	NbTubulin	ENDO	27.482	0.462	26.144									0.2	Manual	Manual	3	15
20211116Ycf-Cy-72h	55	E7	Ycf1-ddH2o	NbTubulin	ENDO	25.727	0.462	26.144									0.2	Manual	Manual	3	15
20211116Ycf-Cy-72h	56	E8	Ycf1-ddH2o	NbTubulin	ENDO	25.392	0.462	26.144									0.2	Manual	Manual	3	15
the third repetition
20211126Ycf-Cy-72h(3-2)	13	B1	ycf1-1	YCF1	Target	25.17	0.404	25.454	-4.501	0.632	0	1	0.342	2.921			0.2	Manual	Manual	3	15
20211126Ycf-Cy-72h(3-2)	14	B2	ycf1-1	YCF1	Target	26.308	0.404	25.454	-4.501	0.632	0	1	0.342	2.921			0.2	Manual	Manual	3	15
20211126Ycf-Cy-72h(3-2)	15	B3	ycf1-1	YCF1	Target	24.467	0.404	25.454	-4.501	0.632	0	1	0.342	2.921			0.2	Manual	Manual	3	15
20211126Ycf-Cy-72h(3-2)	16	B4	ycf1-1	YCF1	Target	25.873	0.404	25.454	-4.501	0.632	0	1	0.342	2.921			0.2	Manual	Manual	3	15
20211126Ycf-Cy-72h(3-2)	17	B5	ycf1-1	NbTubulin	ENDO	31.135	0.486	29.956									0.2	Manual	Manual	3	15
20211126Ycf-Cy-72h(3-2)	18	B6	ycf1-1	NbTubulin	ENDO	28.891	0.486	29.956									0.2	Manual	Manual	3	15
20211126Ycf-Cy-72h(3-2)	19	B7	ycf1-1	NbTubulin	ENDO	29.508	0.486	29.956									0.2	Manual	Manual	3	15
20211126Ycf-Cy-72h(3-2)	20	B8	ycf1-1	NbTubulin	ENDO	30.289	0.486	29.956									0.2	Manual	Manual	3	15
20211126Ycf-Cy-72h(3-2)	37	D1	Ycf1-NC	YCF1	Target	23.608	0.253	23.57	-5.341	0.736	-0.839	1.789	0.514	6.234			0.2	Manual	Manual	3
20211126Ycf-Cy-72h(3-2)	38	D2	Ycf1-NC	YCF1	Target	23.209	0.253	23.57	-5.341	0.736	-0.839	1.789	0.514	6.234			0.2	Manual	Manual	3
20211126Ycf-Cy-72h(3-2)	39	D3	Ycf1-NC	YCF1	Target	23.193	0.253	23.57	-5.341	0.736	-0.839	1.789	0.514	6.234			0.2	Manual	Manual	3
20211126Ycf-Cy-72h(3-2)	40	D4	Ycf1-NC	YCF1	Target	24.272	0.253	23.57	-5.341	0.736	-0.839	1.789	0.514	6.234			0.2	Manual	Manual	3
20211126Ycf-Cy-72h(3-2)	41	D5	Ycf1-NC	NbTubulin	ENDO	28.003	0.134	28.227									0.2	Manual	Manual	3
20211126Ycf-Cy-72h(3-2)	42	D6	Ycf1-NC	NbTubulin	ENDO	28.467	0.134	28.227									0.2	Manual	Manual	3
20211126Ycf-Cy-72h(3-2)	43	D7	Ycf1-NC	NbTubulin	ENDO	30.965	0.134	28.227								Outlier	0.2	Manual	Manual	3
20211126Ycf-Cy-72h(3-2)	44	D8	Ycf1-NC	NbTubulin	ENDO	28.209	0.134	28.227									0.2	Manual	Manual	3
20211126Ycf-Cy-72h(3-2)	49	E1	Ycf1-ddH2O	YCF1	Target	23.434	0.259	23.423	-2.971	0.322	1.53	0.346	0.195	0.614			0.2	Manual	Manual	3
20211126Ycf-Cy-72h(3-2)	50	E2	Ycf1-ddH2O	YCF1	Target	23.089	0.259	23.423	-2.971	0.322	1.53	0.346	0.195	0.614			0.2	Manual	Manual	3
20211126Ycf-Cy-72h(3-2)	51	E3	Ycf1-ddH2O	YCF1	Target	23.019	0.259	23.423	-2.971	0.322	1.53	0.346	0.195	0.614			0.2	Manual	Manual	3
20211126Ycf-Cy-72h(3-2)	52	E4	Ycf1-ddH2O	YCF1	Target	24.151	0.259	23.423	-2.971	0.322	1.53	0.346	0.195	0.614			0.2	Manual	Manual	3
20211126Ycf-Cy-72h(3-2)	53	E5	Ycf1-ddH2O	NbTubulin	ENDO	26.016	0.191	26.394									0.2	Manual	Manual	3
20211126Ycf-Cy-72h(3-2)	54	E6	Ycf1-ddH2O	NbTubulin	ENDO										Omit
20211126Ycf-Cy-72h(3-2)	55	E7	Ycf1-ddH2O	NbTubulin	ENDO	26.532	0.191	26.394									0.2	Manual	Manual	3
20211126Ycf-Cy-72h(3-2)	56	E8	Ycf1-ddH2O	NbTubulin	ENDO	26.634	0.191	26.394									0.2	Manual	Manual	3
Dataset of 96h
Plate	Well ID	Well	Sample	Detector	Task	Ct	Ct Std Err	Avg Ct	Avg dCt	dCt Std Err	ddCt	RQ	RQ Min	RQ Max	Omit	Filtered	Threshold	Auto Ct	Baseline	Start	End
20211122Ycf-Cy-96h(2)	13	B1	Ycf1-1	YCF1	Target	22.659	0.397	22.472	0.264	0.443	0	1	0.454	2.203			0.2	Manual	Manual	3	15
20211122Ycf-Cy-96h(2)	14	B2	Ycf1-1	YCF1	Target	23.257	0.397	22.472	0.264	0.443	0	1	0.454	2.203			0.2	Manual	Manual	3	15
20211122Ycf-Cy-96h(2)	15	B3	Ycf1-1	YCF1	Target	21.367	0.397	22.472	0.264	0.443	0	1	0.454	2.203			0.2	Manual	Manual	3	15
20211122Ycf-Cy-96h(2)	16	B4	Ycf1-1	YCF1	Target	22.607	0.397	22.472	0.264	0.443	0	1	0.454	2.203			0.2	Manual	Manual	3	15
20211122Ycf-Cy-96h(2)	17	B5	Ycf1-1	NbTubulin	ENDO	Undet.		22.209									0.2	Manual	Manual	3	15
20211122Ycf-Cy-96h(2)	18	B6	Ycf1-1	NbTubulin	ENDO	21.886	0.198	22.209									0.2	Manual	Manual	3	15
20211122Ycf-Cy-96h(2)	19	B7	Ycf1-1	NbTubulin	ENDO	22.172	0.198	22.209									0.2	Manual	Manual	3	15
20211122Ycf-Cy-96h(2)	20	B8	Ycf1-1	NbTubulin	ENDO	22.568	0.198	22.209									0.2	Manual	Manual	3	15
20211122Ycf-Cy-96h(2)	37	D1	Ycf1-NC	YCF1	Target	21.394	0.055	21.285	-2.682	0.71	-2.946	7.705	2.174	27.305			0.2	Manual	Manual	3
20211122Ycf-Cy-96h(2)	38	D2	Ycf1-NC	YCF1	Target	21.24	0.055	21.285	-2.682	0.71	-2.946	7.705	2.174	27.305			0.2	Manual	Manual	3
20211122Ycf-Cy-96h(2)	39	D3	Ycf1-NC	YCF1	Target	21.221	0.055	21.285	-2.682	0.71	-2.946	7.705	2.174	27.305			0.2	Manual	Manual	3
20211122Ycf-Cy-96h(2)	40	D4	Ycf1-NC	YCF1	Target	22.512	0.055	21.285	-2.682	0.71	-2.946	7.705	2.174	27.305		Outlier	0.2	Manual	Manual	3
20211122Ycf-Cy-96h(2)	41	D5	Ycf1-NC	NbTubulin	ENDO	23.126	0.116	23.264									0.2	Manual	Manual	3
20211122Ycf-Cy-96h(2)	42	D6	Ycf1-NC	NbTubulin	ENDO	23.173	0.116	23.264									0.2	Manual	Manual	3
20211122Ycf-Cy-96h(2)	43	D7	Ycf1-NC	NbTubulin	ENDO	26.077	0.116	23.264								Outlier	0.2	Manual	Manual	3
20211122Ycf-Cy-96h(2)	44	D8	Ycf1-NC	NbTubulin	ENDO	23.494	0.116	23.264									0.2	Manual	Manual	3
20211122Ycf-Cy-96h(2)	49	E1	Ycf1-ddH2O	YCF1	Target	23.349	0.3	23.397	-1.09	0.415	-1.354	2.555	1.219	5.357			0.2	Manual	Manual	3
20211122Ycf-Cy-96h(2)	50	E2	Ycf1-ddH2O	YCF1	Target	22.782	0.3	23.397	-1.09	0.415	-1.354	2.555	1.219	5.357			0.2	Manual	Manual	3
20211122Ycf-Cy-96h(2)	51	E3	Ycf1-ddH2O	YCF1	Target	23.241	0.3	23.397	-1.09	0.415	-1.354	2.555	1.219	5.357			0.2	Manual	Manual	3
20211122Ycf-Cy-96h(2)	52	E4	Ycf1-ddH2O	YCF1	Target	24.218	0.3	23.397	-1.09	0.415	-1.354	2.555	1.219	5.357			0.2	Manual	Manual	3
20211122Ycf-Cy-96h(2)	53	E5	Ycf1-ddH2O	NbTubulin	ENDO	24.395	0.287	24.487									0.2	Manual	Manual	3
20211122Ycf-Cy-96h(2)	54	E6	Ycf1-ddH2O	NbTubulin	ENDO										Omit
20211122Ycf-Cy-96h(2)	55	E7	Ycf1-ddH2O	NbTubulin	ENDO	25.025	0.287	24.487									0.2	Manual	Manual	3
20211122Ycf-Cy-96h(2)	56	E8	Ycf1-ddH2O	NbTubulin	ENDO	24.042	0.287	24.487									0.2	Manual	Manual	3
second repetition
20211126Ycf-Cy-96h(3)	13	B1	Ycf1-1	YCF1	Target	22.824	0.374	22.645	-1.377	0.552	0	1	0.392	2.551			0.2	Manual	Manual	3	15
20211126Ycf-Cy-96h(3)	14	B2	Ycf1-1	YCF1	Target	23.381	0.374	22.645	-1.377	0.552	0	1	0.392	2.551			0.2	Manual	Manual	3	15
20211126Ycf-Cy-96h(3)	15	B3	Ycf1-1	YCF1	Target	21.602	0.374	22.645	-1.377	0.552	0	1	0.392	2.551			0.2	Manual	Manual	3	15
20211126Ycf-Cy-96h(3)	16	B4	Ycf1-1	YCF1	Target	22.774	0.374	22.645	-1.377	0.552	0	1	0.392	2.551			0.2	Manual	Manual	3	15
20211126Ycf-Cy-96h(3)	17	B5	Ycf1-1	NbTubulin	ENDO	25.176	0.406	24.022									0.2	Manual	Manual	3	15
20211126Ycf-Cy-96h(3)	18	B6	Ycf1-1	NbTubulin	ENDO	23.426	0.406	24.022									0.2	Manual	Manual	3	15
20211126Ycf-Cy-96h(3)	19	B7	Ycf1-1	NbTubulin	ENDO	23.482	0.406	24.022									0.2	Manual	Manual	3	15
20211126Ycf-Cy-96h(3)	20	B8	Ycf1-1	NbTubulin	ENDO	24.003	0.406	24.022									0.2	Manual	Manual	3	15
20211126Ycf-Cy-96h(3)	37	D1	Ycf1-NC	YCF1	Target	22.645	0.377	21.925	-3.814	0.541	-2.438	5.418	2.068	14.195			0.2	Manual	Manual	3	15
20211126Ycf-Cy-96h(3)	38	D2	Ycf1-NC	YCF1	Target	21.357	0.377	21.925	-3.814	0.541	-2.438	5.418	2.068	14.195			0.2	Manual	Manual	3	15
20211126Ycf-Cy-96h(3)	39	D3	Ycf1-NC	YCF1	Target	21.196	0.377	21.925	-3.814	0.541	-2.438	5.418	2.068	14.195			0.2	Manual	Manual	3	15
20211126Ycf-Cy-96h(3)	40	D4	Ycf1-NC	YCF1	Target	22.502	0.377	21.925	-3.814	0.541	-2.438	5.418	2.068	14.195			0.2	Manual	Manual	3	15
20211126Ycf-Cy-96h(3)	41	D5	Ycf1-NC	NbTubulin	ENDO	25.575	0.387	25.739									0.2	Manual	Manual	3	15
20211126Ycf-Cy-96h(3)	42	D6	Ycf1-NC	NbTubulin	ENDO	25.166	0.387	25.739									0.2	Manual	Manual	3	15
20211126Ycf-Cy-96h(3)	43	D7	Ycf1-NC	NbTubulin	ENDO										Omit
20211126Ycf-Cy-96h(3)	44	D8	Ycf1-NC	NbTubulin	ENDO	26.477	0.387	25.739									0.2	Manual	Manual	3	15
20211126Ycf-Cy-96h(3)	49	E1	Ycf1-ddH2O	YCF1	Target	23.163	0.274	23.373	-3.937	0.274	-2.56	5.897	3.478	9.999			0.2	Manual	Manual	3	15
20211126Ycf-Cy-96h(3)	50	E2	Ycf1-ddH2O	YCF1	Target	22.911	0.274	23.373	-3.937	0.274	-2.56	5.897	3.478	9.999			0.2	Manual	Manual	3	15
20211126Ycf-Cy-96h(3)	51	E3	Ycf1-ddH2O	YCF1	Target	23.252	0.274	23.373	-3.937	0.274	-2.56	5.897	3.478	9.999			0.2	Manual	Manual	3	15
20211126Ycf-Cy-96h(3)	52	E4	Ycf1-ddH2O	YCF1	Target	24.166	0.274	23.373	-3.937	0.274	-2.56	5.897	3.478	9.999			0.2	Manual	Manual	3	15
20211126Ycf-Cy-96h(3)	53	E5	Ycf1-ddH2O	NbTubulin	ENDO										Omit
20211126Ycf-Cy-96h(3)	54	E6	Ycf1-ddH2O	NbTubulin	ENDO										Omit
20211126Ycf-Cy-96h(3)	55	E7	Ycf1-ddH2O	NbTubulin	ENDO	27.324	0.014	27.31									0.2	Manual	Manual	3	15
20211126Ycf-Cy-96h(3)	56	E8	Ycf1-ddH2O	NbTubulin	ENDO	27.296	0.014	27.31									0.2	Manual	Manual	3	15
the third repetition
20211202Ycf-Cy-96h	120h(4)	13	B1	1-96h	YCF1	Target	22.261	0.431	22.303	-0.421	0.57	3.756	0.074	0.028	0.194			0.2	Manual	Manual	3	15
20211202Ycf-Cy-96h	120h(4)	14	B2	1-96h	YCF1	Target	23.207	0.431	22.303	-0.421	0.57	3.756	0.074	0.028	0.194			0.2	Manual	Manual	3	15
20211202Ycf-Cy-96h	120h(4)	15	B3	1-96h	YCF1	Target	21.153	0.431	22.303	-0.421	0.57	3.756	0.074	0.028	0.194			0.2	Manual	Manual	3	15
20211202Ycf-Cy-96h	120h(4)	16	B4	1-96h	YCF1	Target	22.591	0.431	22.303	-0.421	0.57	3.756	0.074	0.028	0.194			0.2	Manual	Manual	3	15
20211202Ycf-Cy-96h	120h(4)	17	B5	1-96h	NbTubulin	ENDO	23.84	0.031	22.352								Outlier	0.2	Manual	Manual	3	15
20211202Ycf-Cy-96h	120h(4)	18	B6	1-96h	NbTubulin	ENDO	22.334	0.031	22.352									0.2	Manual	Manual	3	15
20211202Ycf-Cy-96h	120h(4)	19	B7	1-96h	NbTubulin	ENDO	22.309	0.031	22.352									0.2	Manual	Manual	3	15
20211202Ycf-Cy-96h	120h(4)	20	B8	1-96h	NbTubulin	ENDO	22.411	0.031	22.352									0.2	Manual	Manual	3	15
20211202Ycf-Cy-96h	120h(4)	25	C1	NC-96h	YCF1	Target	20.852	0.037	20.876	-2.63	0.134	1.546	0.342	0.27	0.435			0.2	Manual	Manual	3	15
20211202Ycf-Cy-96h	120h(4)	26	C2	NC-96h	YCF1	Target	20.949	0.037	20.876	-2.63	0.134	1.546	0.342	0.27	0.435			0.2	Manual	Manual	3	15
20211202Ycf-Cy-96h	120h(4)	27	C3	NC-96h	YCF1	Target	23.394	0.037	20.876	-2.63	0.134	1.546	0.342	0.27	0.435		Outlier	0.2	Manual	Manual	3	15
20211202Ycf-Cy-96h	120h(4)	28	C4	NC-96h	YCF1	Target	20.826	0.037	20.876	-2.63	0.134	1.546	0.342	0.27	0.435			0.2	Manual	Manual	3	15
20211202Ycf-Cy-96h	120h(4)	29	C5	NC-96h	NbTubulin	ENDO	23.378	0.004	23.378									0.2	Manual	Manual	3	15
20211202Ycf-Cy-96h	120h(4)	30	C6	NC-96h	NbTubulin	ENDO	23.384	0.004	23.378									0.2	Manual	Manual	3	15
20211202Ycf-Cy-96h	120h(4)	31	C7	NC-96h	NbTubulin	ENDO	23.371	0.004	23.378									0.2	Manual	Manual	3	15
20211202Ycf-Cy-96h	120h(4)	32	C8	NC-96h	NbTubulin	ENDO	23.892	0.004	23.378								Outlier	0.2	Manual	Manual	3	15
20211202Ycf-Cy-96h	120h(4)	37	D1	ddH2O-96h	YCF1	Target	22.398	0.196	22.802	-1.781	0.264	2.396	0.19	0.119	0.304			0.2	Manual	Manual	3	15
20211202Ycf-Cy-96h	120h(4)	38	D2	ddH2O-96h	YCF1	Target	22.682	0.196	22.802	-1.781	0.264	2.396	0.19	0.119	0.304			0.2	Manual	Manual	3	15
20211202Ycf-Cy-96h	120h(4)	39	D3	ddH2O-96h	YCF1	Target	22.796	0.196	22.802	-1.781	0.264	2.396	0.19	0.119	0.304			0.2	Manual	Manual	3	15
20211202Ycf-Cy-96h	120h(4)	40	D4	ddH2O-96h	YCF1	Target	23.333	0.196	22.802	-1.781	0.264	2.396	0.19	0.119	0.304			0.2	Manual	Manual	3	15
20211202Ycf-Cy-96h	120h(4)	41	D5	ddH2O-96h	NbTubulin	ENDO	24.327	0.177	24.583									0.2	Manual	Manual	3	15
20211202Ycf-Cy-96h	120h(4)	42	D6	ddH2O-96h	NbTubulin	ENDO	24.499	0.177	24.583									0.2	Manual	Manual	3	15
20211202Ycf-Cy-96h	120h(4)	43	D7	ddH2O-96h	NbTubulin	ENDO										Omit
20211202Ycf-Cy-96h	120h(4)	44	D8	ddH2O-96h	NbTubulin	ENDO	24.924	0.177	24.583									0.2	Manual	Manual	3	15
Dataset of 120h
Plate	Well ID	Well	Sample	Detector	Task	Ct	Ct Std Err	Avg Ct	Avg dCt	dCt Std Err	ddCt	RQ	RQ Min	RQ Max	Omit	Filtered	Threshold	Auto Ct	Baseline	Start	End
20211123Ycf-Cy-120h(2)	13	B1	Ycf1-1	YCF1	Target	21.099	0.416	21.237	-1.839	0.636	0	1	0.294	3.402			0.2	Manual	Manual	3	15
20211123Ycf-Cy-120h(2)	14	B2	Ycf1-1	YCF1	Target	Undet.		21.237	-1.839	0.636	0	1	0.294	3.402			0.2	Manual	Manual	3	15
20211123Ycf-Cy-120h(2)	15	B3	Ycf1-1	YCF1	Target	20.596	0.416	21.237	-1.839	0.636	0	1	0.294	3.402			0.2	Manual	Manual	3	15
20211123Ycf-Cy-120h(2)	16	B4	Ycf1-1	YCF1	Target	22.017	0.416	21.237	-1.839	0.636	0	1	0.294	3.402			0.2	Manual	Manual	3	15
20211123Ycf-Cy-120h(2)	17	B5	Ycf1-1	NbTubulin	ENDO	Undet.		23.076									0.2	Manual	Manual	3	15
20211123Ycf-Cy-120h(2)	18	B6	Ycf1-1	NbTubulin	ENDO	22.191	0.481	23.076									0.2	Manual	Manual	3	15
20211123Ycf-Cy-120h(2)	19	B7	Ycf1-1	NbTubulin	ENDO	23.193	0.481	23.076									0.2	Manual	Manual	3	15
20211123Ycf-Cy-120h(2)	20	B8	Ycf1-1	NbTubulin	ENDO	23.846	0.481	23.076									0.2	Manual	Manual	3	15
20211123Ycf-Cy-120h(2)	37	D1	Ycf1-NC	YCF1	Target	17.762	0.117	17.719	-2.382	0.224	-0.543	1.457	0.976	2.173			0.2	Manual	Manual	3	15
20211123Ycf-Cy-120h(2)	38	D2	Ycf1-NC	YCF1	Target	17.633	0.117	17.719	-2.382	0.224	-0.543	1.457	0.976	2.173			0.2	Manual	Manual	3	15
20211123Ycf-Cy-120h(2)	39	D3	Ycf1-NC	YCF1	Target	17.464	0.117	17.719	-2.382	0.224	-0.543	1.457	0.976	2.173			0.2	Manual	Manual	3	15
20211123Ycf-Cy-120h(2)	40	D4	Ycf1-NC	YCF1	Target	18.017	0.117	17.719	-2.382	0.224	-0.543	1.457	0.976	2.173			0.2	Manual	Manual	3	15
20211123Ycf-Cy-120h(2)	41	D5	Ycf1-NC	NbTubulin	ENDO	19.82	0.192	20.101									0.2	Manual	Manual	3	15
20211123Ycf-Cy-120h(2)	42	D6	Ycf1-NC	NbTubulin	ENDO	20.015	0.192	20.101									0.2	Manual	Manual	3	15
20211123Ycf-Cy-120h(2)	43	D7	Ycf1-NC	NbTubulin	ENDO										Omit
20211123Ycf-Cy-120h(2)	44	D8	Ycf1-NC	NbTubulin	ENDO	20.468	0.192	20.101									0.2	Manual	Manual	3	15
20211123Ycf-Cy-120h(2)	49	E1	Ycf1-ddH2O	YCF1	Target	19.477	0.266	19.45	-2.82	0.476	-0.981	1.974	0.789	4.936			0.2	Manual	Manual	3	15
20211123Ycf-Cy-120h(2)	50	E2	Ycf1-ddH2O	YCF1	Target	18.976	0.266	19.45	-2.82	0.476	-0.981	1.974	0.789	4.936			0.2	Manual	Manual	3	15
20211123Ycf-Cy-120h(2)	51	E3	Ycf1-ddH2O	YCF1	Target	19.897	0.266	19.45	-2.82	0.476	-0.981	1.974	0.789	4.936			0.2	Manual	Manual	3	15
20211123Ycf-Cy-120h(2)	52	E4	Ycf1-ddH2O	YCF1	Target	Undet.		19.45	-2.82	0.476	-0.981	1.974	0.789	4.936			0.2	Manual	Manual	3	15
20211123Ycf-Cy-120h(2)	53	E5	Ycf1-ddH2O	NbTubulin	ENDO	22.137	0.395	22.27									0.2	Manual	Manual	3	15
20211123Ycf-Cy-120h(2)	54	E6	Ycf1-ddH2O	NbTubulin	ENDO										Omit
20211123Ycf-Cy-120h(2)	55	E7	Ycf1-ddH2O	NbTubulin	ENDO	23.011	0.395	22.27									0.2	Manual	Manual	3	15
20211123Ycf-Cy-120h(2)	56	E8	Ycf1-ddH2O	NbTubulin	ENDO	21.663	0.395	22.27									0.2	Manual	Manual	3	15
second repetition
20211117Ycf-Cy-120h	13	B1	Ycf1-1	YCF1	Target	21.35	0.41	21.952	-1.923	0.642	0	1	0.336	2.973			0.2	Manual	Manual	3	15
20211117Ycf-Cy-120h	14	B2	Ycf1-1	YCF1	Target	23.034	0.41	21.952	-1.923	0.642	0	1	0.336	2.973			0.2	Manual	Manual	3	15
20211117Ycf-Cy-120h	15	B3	Ycf1-1	YCF1	Target	21.281	0.41	21.952	-1.923	0.642	0	1	0.336	2.973			0.2	Manual	Manual	3	15
20211117Ycf-Cy-120h	16	B4	Ycf1-1	YCF1	Target	22.144	0.41	21.952	-1.923	0.642	0	1	0.336	2.973			0.2	Manual	Manual	3	15
20211117Ycf-Cy-120h	17	B5	Ycf1-1	NbTubulin	ENDO	25.029	0.494	23.875									0.2	Manual	Manual	3	15
20211117Ycf-Cy-120h	18	B6	Ycf1-1	NbTubulin	ENDO	22.845	0.494	23.875									0.2	Manual	Manual	3	15
20211117Ycf-Cy-120h	19	B7	Ycf1-1	NbTubulin	ENDO	23.297	0.494	23.875									0.2	Manual	Manual	3	15
20211117Ycf-Cy-120h	20	B8	Ycf1-1	NbTubulin	ENDO	24.328	0.494	23.875									0.2	Manual	Manual	3	15
20211117Ycf-Cy-120h	37	D1	Ycf1-NC	YCF1	Target	18.198	0.045	18.262	-2.445	0.293	-0.522	1.436	0.817	2.525			0.2	Manual	Manual	3
20211117Ycf-Cy-120h	38	D2	Ycf1-NC	YCF1	Target	18.348	0.045	18.262	-2.445	0.293	-0.522	1.436	0.817	2.525			0.2	Manual	Manual	3
20211117Ycf-Cy-120h	39	D3	Ycf1-NC	YCF1	Target	18.241	0.045	18.262	-2.445	0.293	-0.522	1.436	0.817	2.525			0.2	Manual	Manual	3
20211117Ycf-Cy-120h	40	D4	Ycf1-NC	YCF1	Target	19.171	0.045	18.262	-2.445	0.293	-0.522	1.436	0.817	2.525		Outlier	0.2	Manual	Manual	3
20211117Ycf-Cy-120h	41	D5	Ycf1-NC	NbTubulin	ENDO	20.414	0.003	20.417									0.2	Manual	Manual	3
20211117Ycf-Cy-120h	42	D6	Ycf1-NC	NbTubulin	ENDO	20.42	0.003	20.417									0.2	Manual	Manual	3
20211117Ycf-Cy-120h	43	D7	Ycf1-NC	NbTubulin	ENDO										Omit
20211117Ycf-Cy-120h	44	D8	Ycf1-NC	NbTubulin	ENDO	21.286	0.003	20.417								Outlier	0.2	Manual	Manual	3
20211117Ycf-Cy-120h	49	E1	Ycf1-ddH2O	YCF1	Target	19.245	0.406	19.65	-2.232	0.437	-0.31	1.24	0.473	3.249			0.2	Manual	Manual	3
20211117Ycf-Cy-120h	50	E2	Ycf1-ddH2O	YCF1	Target										Omit
20211117Ycf-Cy-120h	51	E3	Ycf1-ddH2O	YCF1	Target										Omit
20211117Ycf-Cy-120h	52	E4	Ycf1-ddH2O	YCF1	Target	20.056	0.406	19.65	-2.232	0.437	-0.31	1.24	0.473	3.249			0.2	Manual	Manual	3
20211117Ycf-Cy-120h	53	E5	Ycf1-ddH2O	NbTubulin	ENDO	22.046	0.0009241	22.045									0.2	Manual	Manual	3
20211117Ycf-Cy-120h	54	E6	Ycf1-ddH2O	NbTubulin	ENDO										Omit
20211117Ycf-Cy-120h	55	E7	Ycf1-ddH2O	NbTubulin	ENDO	22.044	0.0009241	22.045									0.2	Manual	Manual	3
20211117Ycf-Cy-120h	56	E8	Ycf1-ddH2O	NbTubulin	ENDO	21.559	0.0009241	22.045								Outlier	0.2	Manual	Manual	3
the third repetition
20211126Ycf-Cy-120h(3)	13	B1	Ycf1-1	YCF1	Target	22.083	0.323	21.874	-2.072	0.527	0	1	0.409	2.446			0.2	Manual	Manual	3	15
20211126Ycf-Cy-120h(3)	14	B2	Ycf1-1	YCF1	Target	22.377	0.323	21.874	-2.072	0.527	0	1	0.409	2.446			0.2	Manual	Manual	3	15
20211126Ycf-Cy-120h(3)	15	B3	Ycf1-1	YCF1	Target	20.924	0.323	21.874	-2.072	0.527	0	1	0.409	2.446			0.2	Manual	Manual	3	15
20211126Ycf-Cy-120h(3)	16	B4	Ycf1-1	YCF1	Target	22.112	0.323	21.874	-2.072	0.527	0	1	0.409	2.446			0.2	Manual	Manual	3	15
20211126Ycf-Cy-120h(3)	17	B5	Ycf1-1	NbTubulin	ENDO	25.043	0.417	23.946									0.2	Manual	Manual	3	15
20211126Ycf-Cy-120h(3)	18	B6	Ycf1-1	NbTubulin	ENDO	23.213	0.417	23.946									0.2	Manual	Manual	3	15
20211126Ycf-Cy-120h(3)	19	B7	Ycf1-1	NbTubulin	ENDO	23.393	0.417	23.946									0.2	Manual	Manual	3	15
20211126Ycf-Cy-120h(3)	20	B8	Ycf1-1	NbTubulin	ENDO	24.137	0.417	23.946									0.2	Manual	Manual	3	15
20211126Ycf-Cy-120h(3)	37	D1	ycf1-NC	YCF1	Target	18.567	0.219	18.689	-2.11	0.225	-0.038	1.027	0.688	1.533			0.2	Manual	Manual	3	15
20211126Ycf-Cy-120h(3)	38	D2	ycf1-NC	YCF1	Target	18.58	0.219	18.689	-2.11	0.225	-0.038	1.027	0.688	1.533			0.2	Manual	Manual	3	15
20211126Ycf-Cy-120h(3)	39	D3	ycf1-NC	YCF1	Target	18.295	0.219	18.689	-2.11	0.225	-0.038	1.027	0.688	1.533			0.2	Manual	Manual	3	15
20211126Ycf-Cy-120h(3)	40	D4	ycf1-NC	YCF1	Target	19.315	0.219	18.689	-2.11	0.225	-0.038	1.027	0.688	1.533			0.2	Manual	Manual	3	15
20211126Ycf-Cy-120h(3)	41	D5	ycf1-NC	NbTubulin	ENDO	20.719	0.053	20.8									0.2	Manual	Manual	3	15
20211126Ycf-Cy-120h(3)	42	D6	ycf1-NC	NbTubulin	ENDO	20.899	0.053	20.8									0.2	Manual	Manual	3	15
20211126Ycf-Cy-120h(3)	43	D7	ycf1-NC	NbTubulin	ENDO										Omit
20211126Ycf-Cy-120h(3)	44	D8	ycf1-NC	NbTubulin	ENDO	20.781	0.053	20.8									0.2	Manual	Manual	3	15
20211126Ycf-Cy-120h(3)	49	E1	ycf1-ddH2O	YCF1	Target	20.214	0.218	20.025	-2.511	0.32	-0.439	1.356	0.767	2.396			0.2	Manual	Manual	3	15
20211126Ycf-Cy-120h(3)	50	E2	ycf1-ddH2O	YCF1	Target	19.74	0.218	20.025	-2.511	0.32	-0.439	1.356	0.767	2.396			0.2	Manual	Manual	3	15
20211126Ycf-Cy-120h(3)	51	E3	ycf1-ddH2O	YCF1	Target	19.598	0.218	20.025	-2.511	0.32	-0.439	1.356	0.767	2.396			0.2	Manual	Manual	3	15
20211126Ycf-Cy-120h(3)	52	E4	ycf1-ddH2O	YCF1	Target	20.547	0.218	20.025	-2.511	0.32	-0.439	1.356	0.767	2.396			0.2	Manual	Manual	3	15
20211126Ycf-Cy-120h(3)	53	E5	ycf1-ddH2O	NbTubulin	ENDO	22.429	0.234	22.536									0.2	Manual	Manual	3	15
20211126Ycf-Cy-120h(3)	54	E6	ycf1-ddH2O	NbTubulin	ENDO										Omit
20211126Ycf-Cy-120h(3)	55	E7	ycf1-ddH2O	NbTubulin	ENDO	22.984	0.234	22.536									0.2	Manual	Manual	3	15
20211126Ycf-Cy-120h(3)	56	E8	ycf1-ddH2O	NbTubulin	ENDO	22.196	0.234	22.536									0.2	Manual	Manual	3	15
