# Supplementary material for: Identification and subcellular localization analysis of membrane protein Ycf 1 in the microsporidian Nosema bombycis
Source: PeerJ. 2022 Jul 8;10:e13530. doi: 10.7717/peerj.13530 (PMC9272817; doi:10.7717/peerj.13530)
Supplement: Supplemental Information 3 [file peerj-10-13530-s003.xlsx]

## Sheet: Sheet1
Using gDNA as a template to detect the ct value at each time point
Dateset( three biological replicates)
Exported RQ Study Sample Summary and Well Information
Document Name: Plate1
Plate Type: ddCt Study
User: Administrator
Document Information
Operator: Administrator
Last Modified:
Instrument Type: Applied Biosystems 7300 Real-Time PCR System
Comments:
SDS v1.4
Thermal Cycler Profile
Stage	Repetitions	Temperature	Time	Ramp Rate	Auto Increment
1	1	95.0 ℃	02:00:00	100
2	40	95.0 ℃	00:10:00	100
		60.0 ℃	00:31:00	100
3 (Dissociation)	1	95.0 ℃	00:15:00	Auto
		60.0 ℃	00:20:00	Auto
		95.0 ℃	00:15:00	Auto
		60.0 ℃	00:15:00	Auto
2700 Mode
Data Collection : Stage 2 Step 2
PCR Volume: 20 μL (volume unit)
Calibrator	1-120
Endogenous Control
RQ Min/Max Calculation Type	Advanced
Confidence	0.95
Plate	Well ID	Well	Sample	Detector	Task	Ct	Ct Std Err	Avg Ct	Avg dCt	dCt Std Err	ddCt	RQ	RQ Min	RQ Max	Omit	Filtered	Threshold	Auto Ct	Baseline	Start	End
20220322 Ycf gDNA(1)	25	C1	1-24	NbTubulin	Target	23.051	0.047	23.07									0.2	Manual	Manual	3	15
20220322 Ycf gDNA(1)	26	C2	1-24	NbTubulin	Target	23.07	0.047	23.07									0.2	Manual	Manual	3	15
20220322 Ycf gDNA(1)	27	C3	1-24	NbTubulin	Target	23.088	0.047	23.07									0.2	Manual	Manual	3	15
20220322 Ycf gDNA(1)	28	C4	1-24	NbTubulin	Target	10.741	0.047	23.07								Outlier	0.2	Manual	Manual	3	15
20220322 Ycf gDNA(1)	29	C5	nc-24	NbTubulin	Target	21.43	0.258	21.198									0.2	Manual	Manual	3	15
20220322 Ycf gDNA(1)	30	C6	nc-24	NbTubulin	Target	21.339	0.258	21.198									0.2	Manual	Manual	3	15
20220322 Ycf gDNA(1)	31	C7	nc-24	NbTubulin	Target	20.438	0.258	21.198									0.2	Manual	Manual	3	15
20220322 Ycf gDNA(1)	32	C8	nc-24	NbTubulin	Target	21.585	0.258	21.198									0.2	Manual	Manual	3	15
20220322 Ycf gDNA(1)	37	D1	1-48	NbTubulin	Target	22.098	0.192	21.852									0.2	Manual	Manual	3	15
20220322 Ycf gDNA(1)	38	D2	1-48	NbTubulin	Target	21.983	0.192	21.852									0.2	Manual	Manual	3	15
20220322 Ycf gDNA(1)	39	D3	1-48	NbTubulin	Target	21.475	0.192	21.852									0.2	Manual	Manual	3	15
20220322 Ycf gDNA(1)	40	D4	1-48	NbTubulin	Target	Undet.		21.852									0.2	Manual	Manual	3	15
20220322 Ycf gDNA(1)	41	D5	nc-48	NbTubulin	Target	21.11	0.459	21.128									0.2	Manual	Manual	3	15
20220322 Ycf gDNA(1)	42	D6	nc-48	NbTubulin	Target	21.443	0.459	21.128									0.2	Manual	Manual	3	15
20220322 Ycf gDNA(1)	43	D7	nc-48	NbTubulin	Target	19.887	0.459	21.128									0.2	Manual	Manual	3	15
20220322 Ycf gDNA(1)	44	D8	nc-48	NbTubulin	Target	22.073	0.459	21.128									0.2	Manual	Manual	3	15
20220322 Ycf gDNA(1)	49	E1	1-72	NbTubulin	Target	20.856	0.34	21.207									0.2	Manual	Manual	3	15
20220322 Ycf gDNA(1)	50	E2	1-72	NbTubulin	Target	21.946	0.34	21.207									0.2	Manual	Manual	3	15
20220322 Ycf gDNA(1)	51	E3	1-72	NbTubulin	Target	20.444	0.34	21.207									0.2	Manual	Manual	3	15
20220322 Ycf gDNA(1)	52	E4	1-72	NbTubulin	Target	21.58	0.34	21.207									0.2	Manual	Manual	3	15
20220322 Ycf gDNA(1)	53	E5	nc-72	NbTubulin	Target	20.853	0.196	20.45									0.2	Manual	Manual	3	15
20220322 Ycf gDNA(1)	54	E6	nc-72	NbTubulin	Target	20.009	0.196	20.45									0.2	Manual	Manual	3	15
20220322 Ycf gDNA(1)	55	E7	nc-72	NbTubulin	Target	20.243	0.196	20.45									0.2	Manual	Manual	3	15
20220322 Ycf gDNA(1)	56	E8	nc-72	NbTubulin	Target	20.696	0.196	20.45									0.2	Manual	Manual	3	15
20220322 Ycf gDNA(1)	61	F1	1-96	NbTubulin	Target	20.809	0.2	20.428									0.2	Manual	Manual	3	15
20220322 Ycf gDNA(1)	62	F2	1-96	NbTubulin	Target	16.328	0.2	20.428								Outlier	0.2	Manual	Manual	3	15
20220322 Ycf gDNA(1)	63	F3	1-96	NbTubulin	Target	20.131	0.2	20.428									0.2	Manual	Manual	3	15
20220322 Ycf gDNA(1)	64	F4	1-96	NbTubulin	Target	20.344	0.2	20.428									0.2	Manual	Manual	3	15
20220322 Ycf gDNA(1)	65	F5	nc-96	NbTubulin	Target	19.146	0.032	19.131									0.2	Manual	Manual	3	15
20220322 Ycf gDNA(1)	66	F6	nc-96	NbTubulin	Target	18.056	0.032	19.131								Outlier	0.2	Manual	Manual	3	15
20220322 Ycf gDNA(1)	67	F7	nc-96	NbTubulin	Target	19.178	0.032	19.131									0.2	Manual	Manual	3	15
20220322 Ycf gDNA(1)	68	F8	nc-96	NbTubulin	Target	19.069	0.032	19.131									0.2	Manual	Manual	3	15
20220322 Ycf gDNA(1)	73	G1	1-120	NbTubulin	Target	16.876	0.271	16.267									0.2	Manual	Manual	3	15
20220322 Ycf gDNA(1)	74	G2	1-120	NbTubulin	Target	15.63	0.271	16.267									0.2	Manual	Manual	3	15
20220322 Ycf gDNA(1)	75	G3	1-120	NbTubulin	Target	16.511	0.271	16.267									0.2	Manual	Manual	3	15
20220322 Ycf gDNA(1)	76	G4	1-120	NbTubulin	Target	16.05	0.271	16.267									0.2	Manual	Manual	3	15
20220322 Ycf gDNA(1)	77	G5	nc-120	NbTubulin	Target	16.197	0.171	16.349									0.2	Manual	Manual	3	15
20220322 Ycf gDNA(1)	78	G6	nc-120	NbTubulin	Target	16.412	0.171	16.349									0.2	Manual	Manual	3	15
20220322 Ycf gDNA(1)	79	G7	nc-120	NbTubulin	Target	15.994	0.171	16.349									0.2	Manual	Manual	3	15
20220322 Ycf gDNA(1)	80	G8	nc-120	NbTubulin	Target	16.793	0.171	16.349									0.2	Manual	Manual	3	15
second repetition
20220322 Ycf gDNA(3)	25	C1	1-24	NbTubulin	Target	23.195	0.184	22.875									0.2	Manual	Manual	3	15
20220322 Ycf gDNA(3)	26	C2	1-24	NbTubulin	Target	22.558	0.184	22.875									0.2	Manual	Manual	3	15
20220322 Ycf gDNA(3)	27	C3	1-24	NbTubulin	Target	22.873	0.184	22.875									0.2	Manual	Manual	3	15
20220322 Ycf gDNA(3)	28	C4	1-24	NbTubulin	Target	17.471	0.184	22.875								Outlier	0.2	Manual	Manual	3	15
20220322 Ycf gDNA(3)	29	C5	nc-24	NbTubulin	Target	21.226	0.189	20.938									0.2	Manual	Manual	3	15
20220322 Ycf gDNA(3)	30	C6	nc-24	NbTubulin	Target	21.038	0.189	20.938									0.2	Manual	Manual	3	15
20220322 Ycf gDNA(3)	31	C7	nc-24	NbTubulin	Target	20.383	0.189	20.938									0.2	Manual	Manual	3	15
20220322 Ycf gDNA(3)	32	C8	nc-24	NbTubulin	Target	21.104	0.189	20.938									0.2	Manual	Manual	3	15
20220322 Ycf gDNA(3)	37	D1	1-48	NbTubulin	Target	21.802	0.337	21.319									0.2	Manual	Manual	3	15
20220322 Ycf gDNA(3)	38	D2	1-48	NbTubulin	Target	21.318	0.337	21.319									0.2	Manual	Manual	3	15
20220322 Ycf gDNA(3)	39	D3	1-48	NbTubulin	Target	20.365	0.337	21.319									0.2	Manual	Manual	3	15
20220322 Ycf gDNA(3)	40	D4	1-48	NbTubulin	Target	21.792	0.337	21.319									0.2	Manual	Manual	3	15
20220322 Ycf gDNA(3)	41	D5	nc-48	NbTubulin	Target	20.861	0.246	20.851									0.2	Manual	Manual	3	15
20220322 Ycf gDNA(3)	42	D6	nc-48	NbTubulin	Target	21.336	0.246	20.851									0.2	Manual	Manual	3	15
20220322 Ycf gDNA(3)	43	D7	nc-48	NbTubulin	Target	20.172	0.246	20.851									0.2	Manual	Manual	3	15
20220322 Ycf gDNA(3)	44	D8	nc-48	NbTubulin	Target	21.033	0.246	20.851									0.2	Manual	Manual	3	15
20220322 Ycf gDNA(3)	49	E1	1-72	NbTubulin	Target	23.636	1.397	21.233									0.2	Manual	Manual	3	15
20220322 Ycf gDNA(3)	50	E2	1-72	NbTubulin	Target	22.544	1.397	21.233									0.2	Manual	Manual	3	15
20220322 Ycf gDNA(3)	51	E3	1-72	NbTubulin	Target	21.504	1.397	21.233									0.2	Manual	Manual	3	15
20220322 Ycf gDNA(3)	52	E4	1-72	NbTubulin	Target	17.25	1.397	21.233									0.2	Manual	Manual	3	15
20220322 Ycf gDNA(3)	53	E5	nc-72	NbTubulin	Target	20.098	0.124	20.157									0.2	Manual	Manual	3	15
20220322 Ycf gDNA(3)	54	E6	nc-72	NbTubulin	Target	20.195	0.124	20.157									0.2	Manual	Manual	3	15
20220322 Ycf gDNA(3)	55	E7	nc-72	NbTubulin	Target	19.868	0.124	20.157									0.2	Manual	Manual	3	15
20220322 Ycf gDNA(3)	56	E8	nc-72	NbTubulin	Target	20.469	0.124	20.157									0.2	Manual	Manual	3	15
20220322 Ycf gDNA(3)	61	F1	1-96	NbTubulin	Target	20.91	0.331	20.286									0.2	Manual	Manual	3	15
20220322 Ycf gDNA(3)	62	F2	1-96	NbTubulin	Target	19.378	0.331	20.286									0.2	Manual	Manual	3	15
20220322 Ycf gDNA(3)	63	F3	1-96	NbTubulin	Target	20.602	0.331	20.286									0.2	Manual	Manual	3	15
20220322 Ycf gDNA(3)	64	F4	1-96	NbTubulin	Target	20.254	0.331	20.286									0.2	Manual	Manual	3	15
20220322 Ycf gDNA(3)	65	F5	nc-96	NbTubulin	Target	19.125	0.206	18.719									0.2	Manual	Manual	3	15
20220322 Ycf gDNA(3)	66	F6	nc-96	NbTubulin	Target	18.192	0.206	18.719									0.2	Manual	Manual	3	15
20220322 Ycf gDNA(3)	67	F7	nc-96	NbTubulin	Target	18.952	0.206	18.719									0.2	Manual	Manual	3	15
20220322 Ycf gDNA(3)	68	F8	nc-96	NbTubulin	Target	18.606	0.206	18.719									0.2	Manual	Manual	3	15
20220322 Ycf gDNA(3)	73	G1	1-120	NbTubulin	Target	17.116	0.341	16.448									0.2	Manual	Manual	3	15
20220322 Ycf gDNA(3)	74	G2	1-120	NbTubulin	Target	15.528	0.341	16.448									0.2	Manual	Manual	3	15
20220322 Ycf gDNA(3)	75	G3	1-120	NbTubulin	Target	16.759	0.341	16.448									0.2	Manual	Manual	3	15
20220322 Ycf gDNA(3)	76	G4	1-120	NbTubulin	Target	16.389	0.341	16.448									0.2	Manual	Manual	3	15
20220322 Ycf gDNA(3)	77	G5	nc-120	NbTubulin	Target	16.327	0.093	16.352									0.2	Manual	Manual	3	15
20220322 Ycf gDNA(3)	78	G6	nc-120	NbTubulin	Target	16.554	0.093	16.352									0.2	Manual	Manual	3	15
20220322 Ycf gDNA(3)	79	G7	nc-120	NbTubulin	Target	16.111	0.093	16.352									0.2	Manual	Manual	3	15
20220322 Ycf gDNA(3)	80	G8	nc-120	NbTubulin	Target	16.416	0.093	16.352									0.2	Manual	Manual	3	15
the third repetition
20220323 Ycf gDNA zhili (4)	25	C1	1-24	NbTubulin	Target	23.694	0.234	23.402									0.2	Manual	Manual	3	15
20220323 Ycf gDNA zhili (4)	26	C2	1-24	NbTubulin	Target	23.425	0.234	23.402									0.2	Manual	Manual	3	15
20220323 Ycf gDNA zhili (4)	27	C3	1-24	NbTubulin	Target	22.734	0.234	23.402									0.2	Manual	Manual	3	15
20220323 Ycf gDNA zhili (4)	28	C4	1-24	NbTubulin	Target	23.754	0.234	23.402									0.2	Manual	Manual	3	15
20220323 Ycf gDNA zhili (4)	29	C5	NC-24	NbTubulin	Target	21.936	0.218	21.707									0.2	Manual	Manual	3	15
20220323 Ycf gDNA zhili (4)	30	C6	NC-24	NbTubulin	Target	22.063	0.218	21.707									0.2	Manual	Manual	3	15
20220323 Ycf gDNA zhili (4)	31	C7	NC-24	NbTubulin	Target	21.747	0.218	21.707									0.2	Manual	Manual	3	15
20220323 Ycf gDNA zhili (4)	32	C8	NC-24	NbTubulin	Target	21.081	0.218	21.707									0.2	Manual	Manual	3	15
20220323 Ycf gDNA zhili (4)	37	D1	1-48	NbTubulin	Target	22.463	0.422	22.094									0.2	Manual	Manual	3	15
20220323 Ycf gDNA zhili (4)	38	D2	1-48	NbTubulin	Target	22.697	0.422	22.094									0.2	Manual	Manual	3	15
20220323 Ycf gDNA zhili (4)	39	D3	1-48	NbTubulin	Target	22.37	0.422	22.094									0.2	Manual	Manual	3	15
20220323 Ycf gDNA zhili (4)	40	D4	1-48	NbTubulin	Target	20.846	0.422	22.094									0.2	Manual	Manual	3	15
20220323 Ycf gDNA zhili (4)	41	D5	NC-48	NbTubulin	Target	21.622	0.133	21.419									0.2	Manual	Manual	3	15
20220323 Ycf gDNA zhili (4)	42	D6	NC-48	NbTubulin	Target	21.425	0.133	21.419									0.2	Manual	Manual	3	15
20220323 Ycf gDNA zhili (4)	43	D7	NC-48	NbTubulin	Target	21.039	0.133	21.419									0.2	Manual	Manual	3	15
20220323 Ycf gDNA zhili (4)	44	D8	NC-48	NbTubulin	Target	21.588	0.133	21.419									0.2	Manual	Manual	3	15
20220323 Ycf gDNA zhili (4)	49	E1	1-72	NbTubulin	Target	22.959	0.715	21.427									0.2	Manual	Manual	3	15
20220323 Ycf gDNA zhili (4)	50	E2	1-72	NbTubulin	Target	21.894	0.715	21.427									0.2	Manual	Manual	3	15
20220323 Ycf gDNA zhili (4)	51	E3	1-72	NbTubulin	Target	21.313	0.715	21.427									0.2	Manual	Manual	3	15
20220323 Ycf gDNA zhili (4)	52	E4	1-72	NbTubulin	Target	19.54	0.715	21.427									0.2	Manual	Manual	3	15
20220323 Ycf gDNA zhili (4)	53	E5	NC-72	NbTubulin	Target	20.315	0.081	20.127									0.2	Manual	Manual	3	15
20220323 Ycf gDNA zhili (4)	54	E6	NC-72	NbTubulin	Target	19.928	0.081	20.127									0.2	Manual	Manual	3	15
20220323 Ycf gDNA zhili (4)	55	E7	NC-72	NbTubulin	Target	20.086	0.081	20.127									0.2	Manual	Manual	3	15
20220323 Ycf gDNA zhili (4)	56	E8	NC-72	NbTubulin	Target	20.18	0.081	20.127									0.2	Manual	Manual	3	15
20220323 Ycf gDNA zhili (4)	61	F1	1-96	NbTubulin	Target	20.306	0.068	20.177									0.2	Manual	Manual	3	15
20220323 Ycf gDNA zhili (4)	62	F2	1-96	NbTubulin	Target	19.764	0.068	20.177								Outlier	0.2	Manual	Manual	3	15
20220323 Ycf gDNA zhili (4)	63	F3	1-96	NbTubulin	Target	20.077	0.068	20.177									0.2	Manual	Manual	3	15
20220323 Ycf gDNA zhili (4)	64	F4	1-96	NbTubulin	Target	20.148	0.068	20.177									0.2	Manual	Manual	3	15
20220323 Ycf gDNA zhili (4)	65	F5	NC-96	NbTubulin	Target	18.888	0.254	18.453									0.2	Manual	Manual	3	15
20220323 Ycf gDNA zhili (4)	66	F6	NC-96	NbTubulin	Target	17.725	0.254	18.453									0.2	Manual	Manual	3	15
20220323 Ycf gDNA zhili (4)	67	F7	NC-96	NbTubulin	Target	18.529	0.254	18.453									0.2	Manual	Manual	3	15
20220323 Ycf gDNA zhili (4)	68	F8	NC-96	NbTubulin	Target	18.671	0.254	18.453									0.2	Manual	Manual	3	15
20220323 Ycf gDNA zhili (4)	73	G1	1-120	NbTubulin	Target	16.567	0.2	17.044									0.2	Manual	Manual	3	15
20220323 Ycf gDNA zhili (4)	74	G2	1-120	NbTubulin	Target	17.514	0.2	17.044									0.2	Manual	Manual	3	15
20220323 Ycf gDNA zhili (4)	75	G3	1-120	NbTubulin	Target	17.172	0.2	17.044									0.2	Manual	Manual	3	15
20220323 Ycf gDNA zhili (4)	76	G4	1-120	NbTubulin	Target	16.922	0.2	17.044									0.2	Manual	Manual	3	15
20220323 Ycf gDNA zhili (4)	77	G5	NC-120	NbTubulin	Target	17.196	0.22	16.759									0.2	Manual	Manual	3	15
20220323 Ycf gDNA zhili (4)	78	G6	NC-120	NbTubulin	Target	16.148	0.22	16.759									0.2	Manual	Manual	3	15
20220323 Ycf gDNA zhili (4)	79	G7	NC-120	NbTubulin	Target	16.853	0.22	16.759									0.2	Manual	Manual	3	15
20220323 Ycf gDNA zhili (4)	80	G8	NC-120	NbTubulin	Target	16.839	0.22	16.759									0.2	Manual	Manual	3	15
